# Supplementary material for: Developing a measure to assess the quality of care transitions for older people
Source: Springer Nature journal article supplement (doi:10.1186/s12913-019-4306-8), 2019-07-19
Supplement: MOESM1 [file 16965516]

Additional file 1

PACT-M 1 Pilot Version

|                                                                                                                    | Strongly Disagree | Disagree | Neither Agree nor Disagree | Agree | Agree Strongly | Don't Know/Don't Remember/ Not Applicable |
|--------------------------------------------------------------------------------------------------------------------|-------------------|----------|----------------------------|-------|----------------|-------------------------------------------|
| 1. I felt I could ask staff questions about what will happen after going home.                                     |                   |          |                            |       |                |                                           |
| 2. Before leaving the hospital I was confident I understood how to manage my medication.                           |                   |          |                            |       |                |                                           |
| 3. While I was in hospital, staff helped me to prepare for things that I might find difficult when I go back home. |                   |          |                            |       |                |                                           |
| 4. Before leaving the hospital, I understood how to get help or support from my community services.                |                   |          |                            |       |                |                                           |
| 5. Before leaving the hospital I knew what arrangements had been made to support me at home.                       |                   |          |                            |       |                |                                           |
| 6. While I was in hospital, there was someone who I could talk to if I was worried about going home.               |                   |          |                            |       |                |                                           |
| 7. Before leaving the hospital, I felt confident about what to do if my health became worse at home.               |                   |          |                            |       |                |                                           |
| 8. I feel that my concerns around my health had been addressed before I went home.                                 |                   |          |                            |       |                |                                           |

| <b>Problems in your care</b>                                                                                                       | <b>Yes</b> | <b>No</b> |
|------------------------------------------------------------------------------------------------------------------------------------|------------|-----------|
| 1. Have you had any infections?                                                                                                    |            |           |
| 2. Have you had a fall?                                                                                                            |            |           |
| 3. Have you had any difficulty getting an appointment with a doctor or other healthcare person?                                    |            |           |
| 4. Have you had any problems with your medication?                                                                                 |            |           |
| 5. Have you had any problems getting essential healthcare supplies (like pads or prescribed feed)?                                 |            |           |
| 6. Have you had any additional problems that led to contacting the GP or anyone else, or go to the hospital or emergency services? |            |           |

|                                                                                               |
|-----------------------------------------------------------------------------------------------|
| <b>If you have answered yes to any of the above questions, could you please tell us more?</b> |
|                                                                                               |

| <b>Open text question</b>        | <b>Free text</b> |
|----------------------------------|------------------|
| What else would you like to add? |                  |

PACT-M 2 Pilot Version

|                                                                                                                                    | Strongly Disagree | Disagree | Neither Agree nor Disagree | Agree | Agree Strongly | Don't Know/Don't Remember/Not Applicable |
|------------------------------------------------------------------------------------------------------------------------------------|-------------------|----------|----------------------------|-------|----------------|------------------------------------------|
| 1. I know who to contact if I have any questions around my health and healthcare.                                                  |                   |          |                            |       |                |                                          |
| 2. I know how to manage my medicines.                                                                                              |                   |          |                            |       |                |                                          |
| 3. I have the necessary support to manage everyday activities (e.g. cooking, cleaning, buying food, showering, walking, dressing). |                   |          |                            |       |                |                                          |
| 4. I feel I have the support I need from community health services (e.g. doctors, nurses, home care staff).                        |                   |          |                            |       |                |                                          |
| 5. I feel confident about managing my health at home.                                                                              |                   |          |                            |       |                |                                          |
| 6. I feel that there is someone I can talk to about my worries (for example, health care staff or my family).                      |                   |          |                            |       |                |                                          |
| 7. I know what to do and who to contact if my health gets worse.                                                                   |                   |          |                            |       |                |                                          |
| 8. I feel I can now manage my care safely at home                                                                                  |                   |          |                            |       |                |                                          |

| Problems in your care                                                                                                              | Yes | No |
|------------------------------------------------------------------------------------------------------------------------------------|-----|----|
| 1. Have you had any infections?                                                                                                    |     |    |
| 2. Have you had a fall?                                                                                                            |     |    |
| 3. Have you had any difficulty getting an appointment with a doctor or other healthcare person?                                    |     |    |
| 4. Have you had any problems with your medication?                                                                                 |     |    |
| 5. Have you had any problems getting essential healthcare supplies (like pads or prescribed feed)?                                 |     |    |
| 6. Have you had any additional problems that led to contacting the GP or anyone else, or go to the hospital or emergency services? |     |    |

**If you have answered yes to any of the above questions, could you please tell us more?**

|  |
|--|
|  |
|--|

| <b>Open text question</b>        | <b>Free text</b> |
|----------------------------------|------------------|
| What else would you like to add? |                  |
